# Supplementary material for: Enrichment of centromeric DNA from human cells
Source: PubMed Central journal article supplement (PMC9295943; doi:10.1371/journal.pgen.1010306), 2022-07-19
Supplement: pgen.1010306.s007.pdf [file pgen.1010306.s007.pdf]

**Table S1:** Genomic coordinates on the T2T-CHM13v1.0 reference genome that define the boundaries of the centromeric regions.

| <b>Chromosome</b> | <b>start</b> | <b>end</b> |
|-------------------|--------------|------------|
| chr1              | 121619339    | 126824297  |
| chr2              | 92297388     | 95077534   |
| chr3              | 90339864     | 96498631   |
| chr4              | 49705248     | 55303286   |
| chr5              | 46161723     | 50962189   |
| chr6              | 58243527     | 61413737   |
| chr7              | 60041897     | 64188432   |
| chr8              | 43846453     | 46920432   |
| chr9              | 44938599     | 47609552   |
| chr10             | 39068394     | 42061834   |
| chr11             | 50537301     | 54487964   |
| chr12             | 34485615     | 37369869   |
| chr13             | 16220369     | 18249463   |
| chr14             | 10125077     | 12841225   |
| chr15             | 15683284     | 18327600   |
| chr16             | 35743659     | 38213682   |
| chr17             | 23407665     | 27656858   |
| chr18             | 15542843     | 21125452   |
| chr19             | 24352654     | 30261056   |
| chr20             | 26281854     | 29953422   |
| chr21             | 11699867     | 12078398   |
| chr22             | 12326835     | 16903875   |
| chrX              | 57593566     | 61247455   |
